# Supplementary material for: A synergistic pinning effect in a layer-structured oxide cathode for enhancing stability towards potassium-ion batteries
Source: Royal Society of Chemistry journal article supplement (doi:10.1039/d4ta02504k), 2024-01-01
Supplement: d4ta02504k1.pdf [file d4ta02504k1.pdf]

## Supporting Information

# Synergistic Pinning Effect in Layer-structured Oxide Cathode for Enhancing Stability towards Potassium-Ion Batteries

*Xuan-Wen Gao,<sup>a,b</sup> Shuai-Shuai Wang,<sup>a</sup> Qi Li,<sup>a</sup> Rui Yang,<sup>a</sup> Zhaomeng Liu,<sup>a,b</sup> Wen-Bin Luo\**

<sup>a</sup>Institute for Energy Electrochemistry and Urban Mines Metallurgy, School of Metallurgy, Northeastern University, Shen yang, Liaoning 110819, China.

<sup>b</sup>Key Laboratory of Advanced Energy Materials Chemistry (Ministry of Education), College of Chemistry, Nankai University, Tianjin 300071, China

Corresponding Authors

E-mail: luowenbin@smm.neu.edu.cn

## KEYWORDS

Potassium ion battery; layer-structured oxide; cathode materials; structural stability; phase transformation

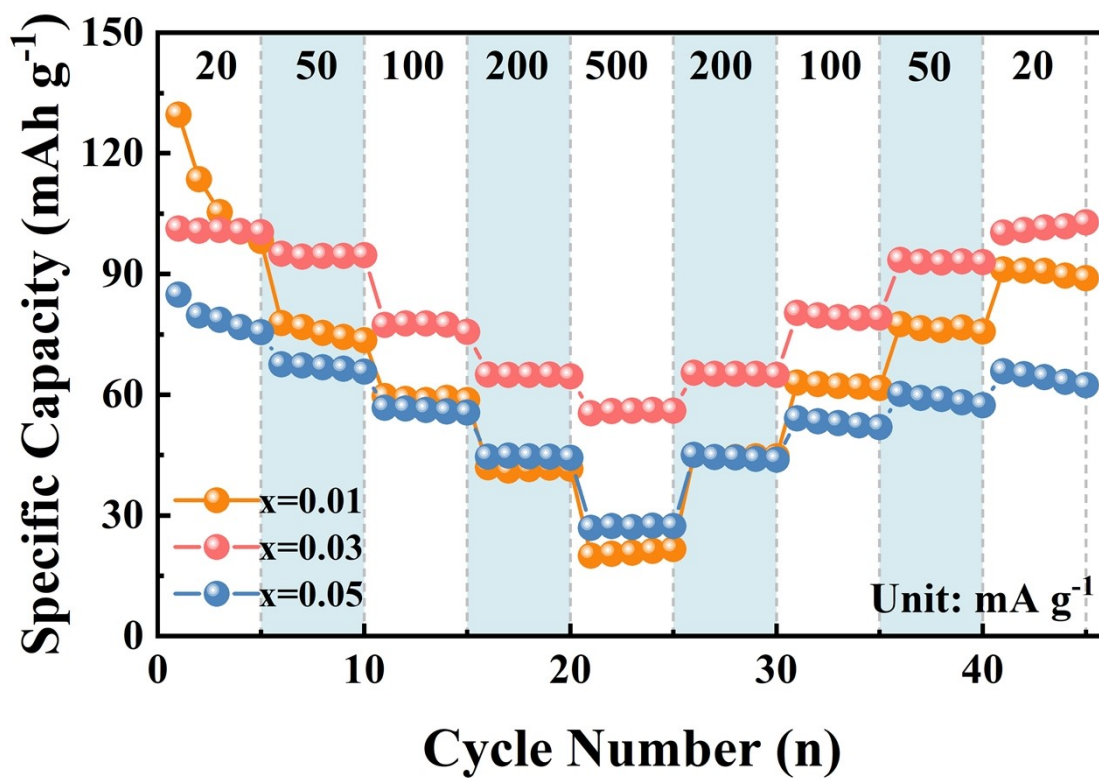

Figure S1. Rate performance comparison of  $\text{K}_{0.5}\text{Mn}_{0.9-x}\text{Co}_{0.05}\text{Fe}_{0.05}\text{Li}_x\text{O}_2$  ( $x = 0.01, 0.03, 0.05$ ).

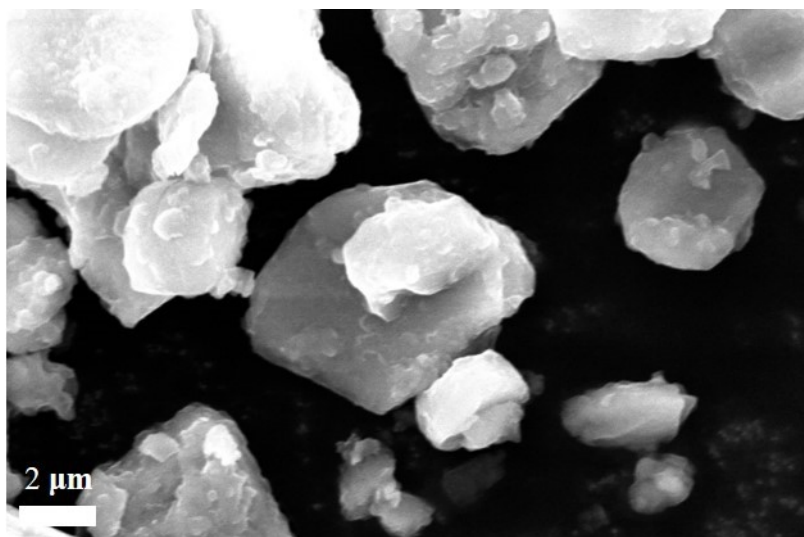

Figure S2. SEM image of KMCFO.

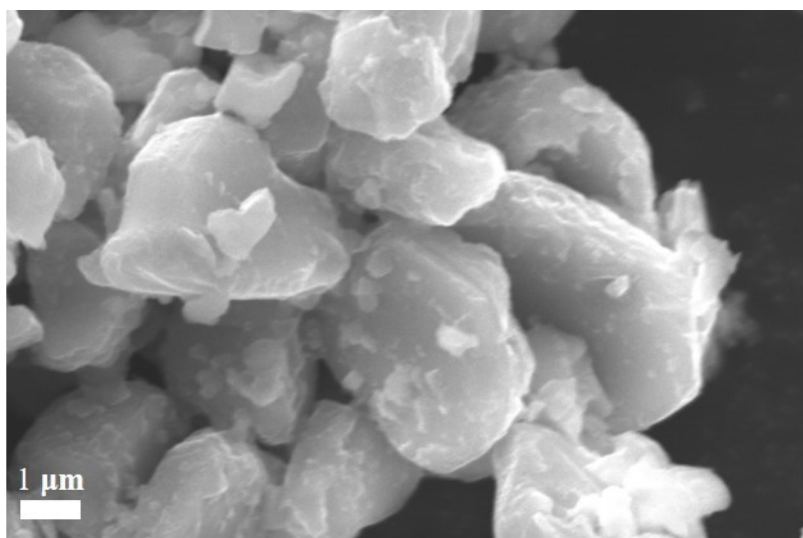

**Figure S3.** SEM image of KMCFO.

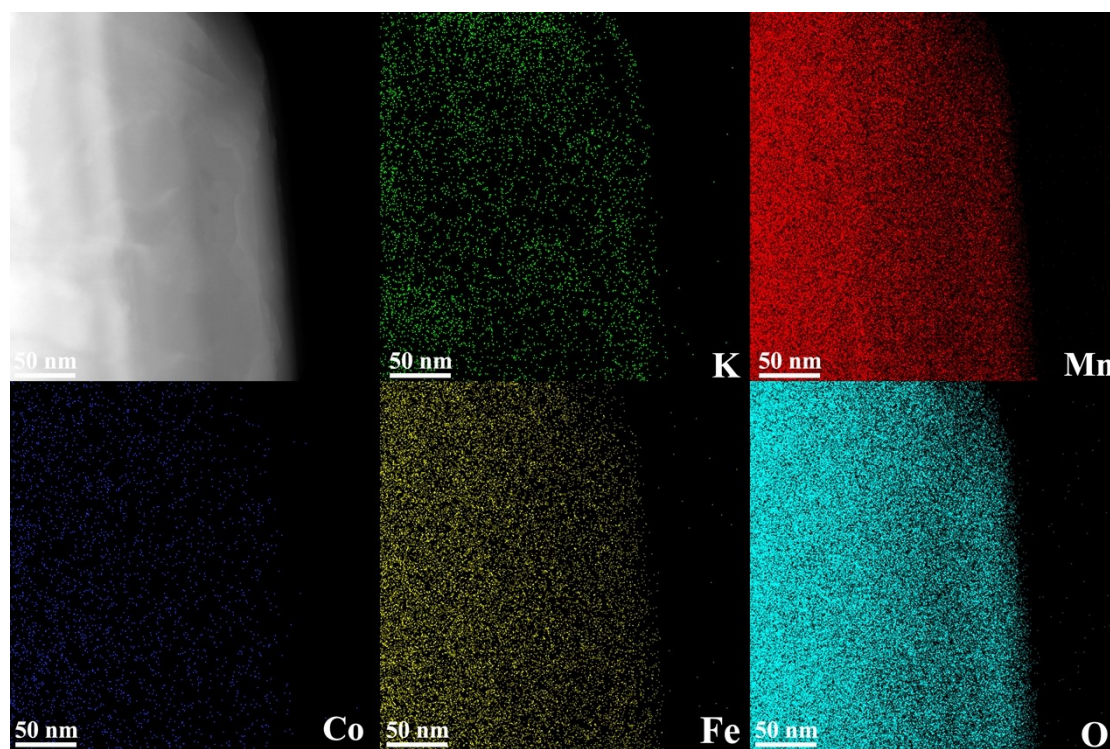

**Figure S4.** TEM image and the corresponding EDS mapping of the KMCFO.

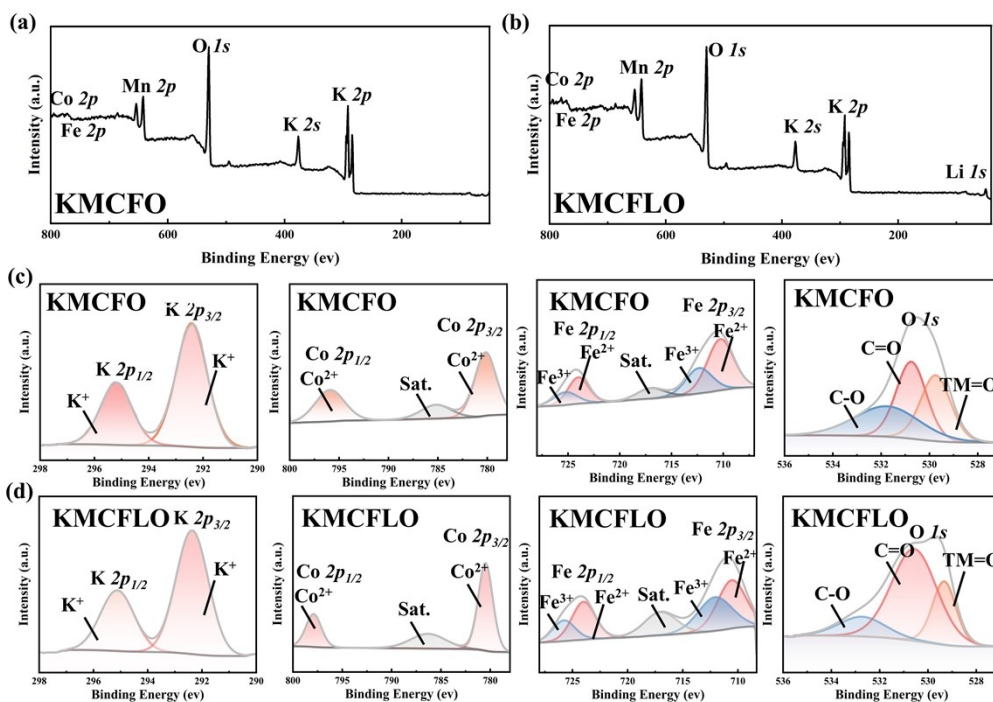

**Figure S5.** XPS spectra and fitting results: survey spectra of a) KMCFO and b) KMCFLO, c) K 2p, Co 2p, Fe 2p and O 1s of KMCFO, d) K 2p, Co 2p, Fe 2p and O 1s of KMCFLO.

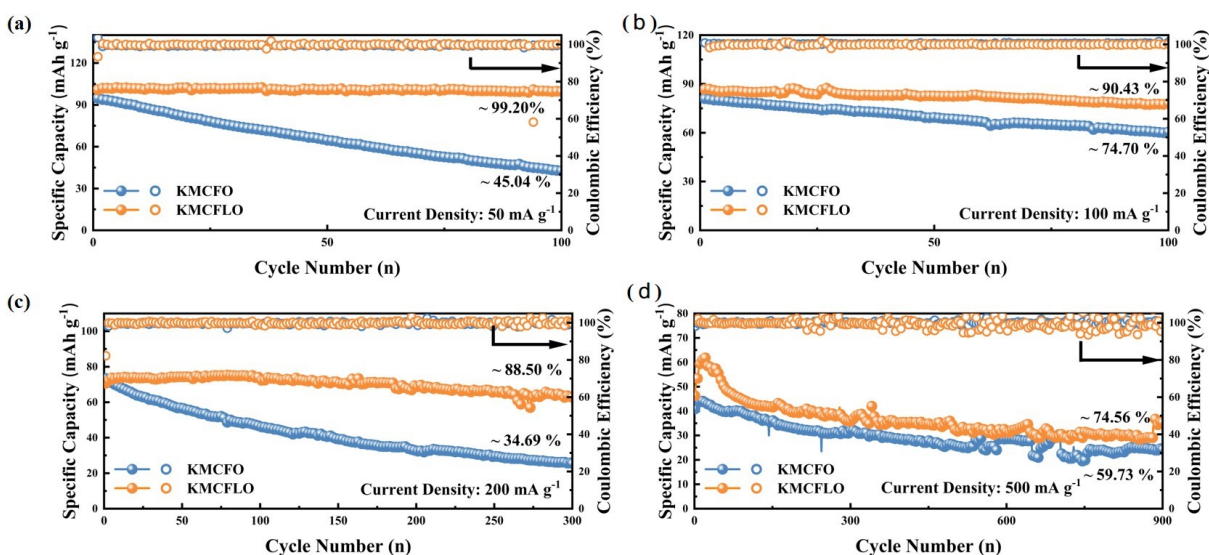

**Figure S6.** Long-term cycling performance of KMCFO and KMCFLO at a) 50 mA g<sup>-1</sup>, b) 100 mA g<sup>-1</sup>, c) 200 mA g<sup>-1</sup>, d) 500 mA g<sup>-1</sup>.

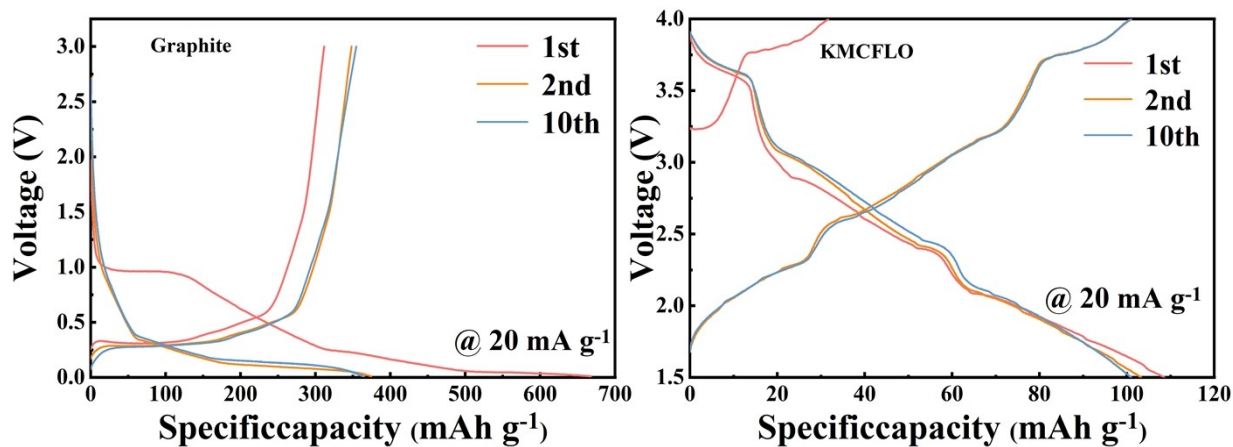

**Figure S7.** Electrochemical performance of KMCFO and graphite electrodes in half-cells.

**Table S1.** Structural parameters of KMCFO and KMCFL obtained by Rietveld refinement of Figure 1a.

|       | a-axis (Å) | c-axis (Å) | R <sub>wp</sub> (%) | GOF  | Space group | ICDD-PDF | Wt%   |
|-------|------------|------------|---------------------|------|-------------|----------|-------|
| KMCFO | 2.827      | 20.999     | 3.85                | 4.38 | R 3 m       | 16-0205  | —     |
| KMCFL | 2.886      | 20.886     | 7.984               | 5.78 | R 3 m       | 16-0205  | 95.1  |
| O     | 4.929      | 8.5305     |                     |      |             |          | C 2/c |

**Table S2.** Information of the fitting procedure for XPS test results of powder samples.

| Samples and Current           | Initial Specific Discharge      | Number of Cycles | Capacity Retention |
|-------------------------------|---------------------------------|------------------|--------------------|
| Density (mA g <sup>-1</sup> ) | Capacity (mAh g <sup>-1</sup> ) | (n)              | (%)                |
| KMCFO                         | 20                              | 103.8            | 68.04              |
|                               | 50                              | 94.7             | 45.04              |
|                               | 100                             | 80.8             | 74.70              |
|                               | 200                             | 73.3             | 34.69              |
|                               | 500                             | 40.8             | 59.73              |
| KMCFLO                        | 20                              | 107.1            | 82.36              |
|                               | 50                              | 100.8            | 99.20              |
|                               | 100                             | 86.8             | 90.43              |
|                               | 200                             | 70.6             | 88.50              |
|                               | 500                             | 46.3             | 74.56              |

**Table S3.** Information of the fitting procedure for XPS test results of powder samples.

| Samples and Elemental | Position        | FWHM Constraint (eV) | Residual Standard |
|-----------------------|-----------------|----------------------|-------------------|
| Orbits                | Constraint (eV) |                      | Deviation         |
| KMCFLO                | K <i>2p</i>     | $\Delta_K=2.8$       | 3.01              |
|                       | Mn <i>2p</i>    | $\Delta_{Mn}=11.2$   | 1.753             |
|                       | Co <i>2p</i>    | $\Delta_{Co}=14.99$  | 1.21              |
|                       | Fe <i>2p</i>    | $\Delta_{Fe}=13.1$   | 1.19              |
|                       | Li <i>1s</i>    | /                    | 1.283             |
|                       | O <i>1s</i>     | /                    | 1.348             |
| KMCFO                 | K <i>2p</i>     | $\Delta_K=2.8$       | 2.147             |
|                       | Mn <i>2p</i>    | $\Delta_{Mn}=11.2$   | 1.302             |
|                       | Co <i>2p</i>    | $\Delta_{Co}=14.99$  | 1.005             |

|         |                           |         |        |
|---------|---------------------------|---------|--------|
| Fe $2p$ | $\Delta_{\text{Fe}}=13.1$ | 0.5-3.0 | 1.136  |
| O $1s$  | /                         | 0.5-2.5 | 0.8965 |

**Table S4.** The information on the split fitting peak of XPS tests for Fe  $2p$ , Co  $2p$ , K  $2p$  and O  $1s$  in KMCFO and KMCFLO materials.

| Samples and Elemental<br>Orbits | Peak Position of the<br>Fitting Peak (eV) | FWHM Constraint<br>(eV) |         |
|---------------------------------|-------------------------------------------|-------------------------|---------|
| KMCFO                           | K $2p_{1/2}$                              | 295.19                  | 0.5-2.0 |
|                                 | K $2p_{3/2}$                              | 294.42                  | 0.5-2.0 |
|                                 | Co $2p_{1/2}$                             | 795.93                  | 0.5-2.0 |
|                                 | Co $2p_{3/2}$                             | 780.18                  | 0.5-2.0 |
|                                 | Fe $2p_{1/2}$                             | 724.00, 725.26          | 0.5-3.0 |
|                                 | Fe $2p_{3/2}$                             | 710.28, 712.33          | 0.5-3.0 |
|                                 | O $1s$                                    | 529.70, 530.75, 531.75  | 0.5-2.5 |
|                                 | KMCFLO                                    | K $2p_{1/2}$            | 295.12  |
| K $2p_{3/2}$                    |                                           | 292.36                  | 0.5-2.0 |
| Co $2p_{1/2}$                   |                                           | 795.17                  | 0.5-2.0 |
| Co $2p_{3/2}$                   |                                           | 780.14                  | 0.5-2.0 |
| Fe $2p_{1/2}$                   |                                           | 723.99, 725.78          | 0.5-3.0 |
| Fe $2p_{3/2}$                   |                                           | 710.55, 712.07          | 0.5-3.0 |
| O $1s$                          |                                           | 529.3, 530.57, 532.72   | 0.5-2.5 |

**Table S5.** The comparison of electrochemical performances between some reported cathode materials and KMCFL0 in this work.

| Cathode                         | Method          | Voltage range | Capacity                                            | Capacity retention                            |
|---------------------------------|-----------------|---------------|-----------------------------------------------------|-----------------------------------------------|
| $K_{0.32}MnO_2$                 | hydrothermal    | 2.0-4.5V      | 28.8 mA h g <sup>-1</sup> at 500 mA g <sup>-1</sup> | 73.37% at 100 mA g <sup>-1</sup> (100 cycles) |
| $K_{0.44}Ni_{0.22}Mn_{0.78}O_2$ | solid-state     | 1.5-4.0V      | 58 mA h g <sup>-1</sup> at 500 mA g <sup>-1</sup>   | 67% at 200 mA g <sup>-1</sup> (500 cycles)    |
| $K_{0.3}Mn_{0.95}Co_{0.05}O_2$  | sol-gel         | 2.0-3.6V      | 99 mA h g <sup>-1</sup> at 22 mA g <sup>-1</sup>    | 75% at 173 mA g <sup>-1</sup> (500 cycles)    |
| $K_{0.6}CoO_2$                  | solvent-thermal | 1.7-4.0 V     | 40 mA h g <sup>-1</sup> at 200 mA g <sup>-1</sup>   | 87% at 40 mA g <sup>-1</sup> (300 cycles)     |
| $KCrO_2$                        | solid-state     | 1.5-4.0 V     | 31 mA h g <sup>-1</sup> at 500 mA g <sup>-1</sup>   | 67% at 10 mA g <sup>-1</sup> (100 cycles)     |
| $K_{0.5}MnO_2@Al_2O_3$          | solvothermal    | 1.5-4.0 V     | 95.3 mA h g <sup>-1</sup> at 50 mA g <sup>-1</sup>  | 53% at 50 mA g <sup>-1</sup> (300 cycles)     |
| $K_{0.54}Mn_{0.78}Mg_{0.22}O_2$ | solid-state     | 1.5-4.0 V     | 96.8 mA h g <sup>-1</sup> at 100 mA g <sup>-1</sup> | 84% at 100 mA g <sup>-1</sup> (100 cycles)    |
| $K_{0.5}Mn_{0.9}Mg_{0.1}O_2$    | solid-state     | 1.5-4.0 V     | 102 mA h g <sup>-1</sup> at 10 mA g <sup>-1</sup>   | 21.5% at 100 mA g <sup>-1</sup> (400 cycles)  |



**Table S6.** Fitting results of variable temperature electrochemical impedance spectroscopy and apparent activation energy magnitude.

| Sample | Temperature (°C) | $R_{ct}$ ( $\Omega$ ) | $E_a$ (KJ mol <sup>-1</sup> ) |
|--------|------------------|-----------------------|-------------------------------|
| KMCFO  | 10               | 37930                 | 84.04                         |
|        | 15               | 21786                 |                               |
|        | 20               | 12844                 |                               |
|        | 25               | 7540                  |                               |
|        | 30               | 4506                  |                               |
| KMCFO  | 10               | 26746                 | 81.55                         |
|        | 15               | 15734                 |                               |
|        | 20               | 8940                  |                               |
|        | 25               | 5614                  |                               |
|        | 30               | 3207                  |                               |

**Table S7.** The peak current at different scan rates and calculation results of  $D_k$ .

| Sample | Position | Peak current (mA, follow the scan rates of 0.2, 0.5, 1, 2, 5 mV s <sup>-1</sup> , the '-' for discharge) | Slope of the fitting curve | $D_k$ (cm <sup>2</sup> s <sup>-1</sup> , '-' for discharge) |
|--------|----------|----------------------------------------------------------------------------------------------------------|----------------------------|-------------------------------------------------------------|
| KMCFO  | Peak 1   | 0.024, 0.057, 0.133, 0.206, 0.449                                                                        | 0.246                      | $4.49 \times 10^{-10}$                                      |
|        | Peak 2   | -0.027, -0.058, -0.090, -0.143, -0.254                                                                   | -0.127                     | $-2.32 \times 10^{-10}$                                     |
|        | Peak 3   | -0.024, -0.062, -0.098, -0.181, -0.379                                                                   | -0.126                     | $-2.30 \times 10^{-10}$                                     |
| KMCFO  | Peak 1   | 0.028, 0.071, 0.147, 0.265, 0.581                                                                        | 0.312                      | $5.70 \times 10^{-10}$                                      |
|        | Peak 2   | -0.036, -0.071, -0.118, -0.219, -0.424                                                                   | -0.220                     | $-4.02 \times 10^{-10}$                                     |
|        | Peak 3   | -0.043, -0.100, -0.172, -0.301, -0.621                                                                   | -0.300                     | $-5.48 \times 10^{-10}$                                     |
